# Supplementary material
Source: Springer Nature journal article supplement (https://www.springerprofessional.de/resource/supplementary/13638_2014_999_MOESM6_ESM.pdf/11898978)

Empirical CDF of MIMO channel correlation in Simulated ITU Pedestrian B Radio Channel

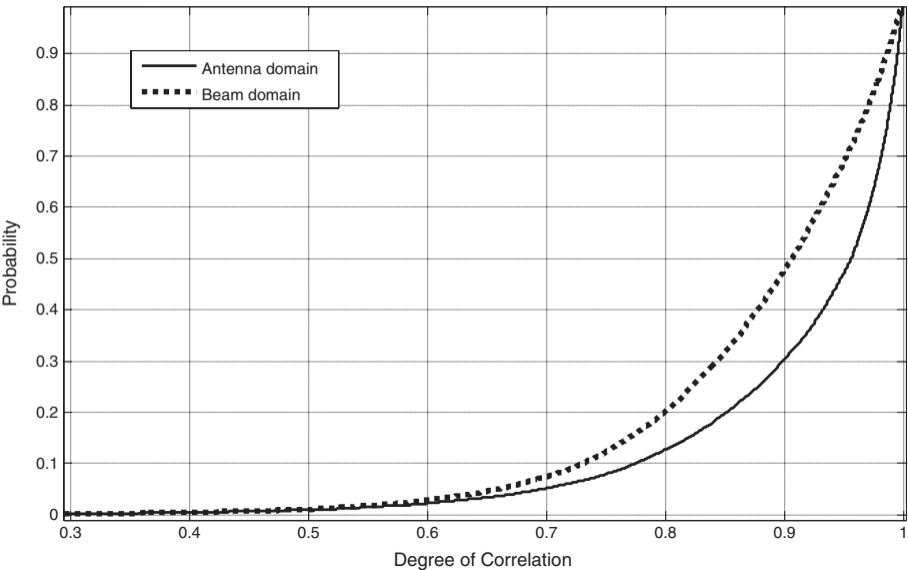

Supplement: MOESM6 [file 11898978]
